# Supplementary material for: High Cholesterol Diet‐Induced Changes in Oxysterol and Scavenger Receptor Levels in Heart Tissue
Source: Hindawi journal article supplement (doi:10.1155/2018/8520746), 2018-01-01
Supplement: f1 [file 8520746.f1.pdf]

**Supplemental Table 1.** Identified fatty acid profile which contains trivial and the IUPAC names together with short-hand nomenclature.

| Abbreviation | Trivial name                     | International Union of Pure and Applied Chemistry name    |
|--------------|----------------------------------|-----------------------------------------------------------|
| C15:0        | Pentadecylic acid                | Pentadecanoic acid                                        |
| C16:0        | Palmitic acid                    | Hexadecanoic acid                                         |
| C16:1n-7     | Palmitoleic acid                 | (9Z)-Hexadec-9-enoic acid                                 |
| C17:0        | Margaric acid                    | Heptadecanoic acid                                        |
| C18:0        | Stearic acid                     | Octadecanoic acid                                         |
| C18:1n-9     | Oleic acid                       | (9Z)-Octadec-9-enoic acid                                 |
| C18:2n-6     | Linoleic acid                    | (9Z,12Z)-Octadeca-9,12-dienoic acid                       |
| C18:3n-6     | $\gamma$ -linolenic acid         | (6Z,9Z,12Z)-Octadeca-6,9,12-trienoic acid                 |
| C18:3n-3     | $\alpha$ -linolenic acid         | (9Z,12Z,15Z)-octadeca-9,12,15-trienoic acid               |
| C19:0        | Nonadecylic acid                 | Nonadecanoic acid                                         |
| C20:0        | Arachidic acid                   | Icosanoic acid                                            |
| C20:1n-9     | Gondoic acid                     | (11Z)-Eicos-11-enoic acid                                 |
| C20:2n-6     | Eicosadienoic acid               | (11Z,14Z)-Icosa-11,14-dienoic acid                        |
| C20:3n-6     | Dihomo- $\gamma$ -linolenic acid | (8Z,11Z,14Z)-Icosa-8,11,14-trienoic acid                  |
| C20:4n-6     | Arachidonic acid                 | (5Z,8Z,11Z,14Z)-Icosa-5,8,11,14-tetraenoic acid           |
| C22:0        | Behenic acid                     | Docosanoic acid                                           |
| C22:4n-6     | Adrenic acid                     | (7Z,10Z,13Z,16Z)-Docosa-7,10,13,16-tetraenoic acid        |
| C22:5n-6     | Osbond acid                      | (4Z,7Z,10Z,13Z,16Z)-Docosa-4,7,10,13,16-pentaenoic acid   |
| C22:5n-3     | Docosapentaenoic acid            | (7Z,10Z,13Z,16Z,19Z)-docosa-7,10,13,16,19-pentaenoic acid |

**Supplemental Table 2.** Primer sequences used for the quantitative real-time PCR experiments.

| Gene           | 5' Primer             | 3' Primer            |
|----------------|-----------------------|----------------------|
| SR-B2 (CD36)   | CCTCCTTGGCCTGGTAGAAA  | TGTGCTACAGAGGAGAGTGC |
| SR-D1 (CD68)   | TCCAGTTGAGAGTCGGCATT  | GGAGTGGCAGTTGTAGGTCT |
| SR-A (CD204)   | TGGACCAAAAAGGCCAAAAGG | GGGACCAGTACCTTGTCCAA |
| SR-B1          | CAACGACAATGACACCGTGT  | TCGTAGCCCCACATGATCTC |
| SR-F1          | GGCTCAGGATAGGTCCTCC   | CGCTGGAAGTGAAGTCTTT  |
| SR-G           | CCAAGTACACAGAGGAGGCA  | CTAGCTGCTTCTGGTTCTGC |
| ABCA1          | ACTTGCTCAGCGGGATGGAT  | AGGCTGAACACCAAGGCGAT |
| $\beta$ -actin | ACGAAACCTAACGGCGCAGA  | TTTGGGGATGCTCGCTCCAA |
